# Supplementary material for: Biosorption Behavior of Basic Red 46 and Violet 3 by Dead Pleurotus mutilus from Single‐ and Multicomponent Systems
Source: Hindawi journal article supplement (doi:10.1155/2013/965041), 2012-11-12
Supplement: f1 [file 965041.f1.docx]

Fig. S1. Molecular structure of Basic Red 46 (BR46) (a) and Crystal Violet (CV)

1. (b)

Fig. S2. Pseudo-second- order kinetics of CV on to *P. Mutilus* at various initial concentrations

Fig.S3. Pseudo-second-sorption kinetics of BR46 onto *P.Mutilus* at various initial concentrations

Fig.S4.Pseudo-second-sorption kinetics of CV onto *P.Mutilus* at various solution temperatures

Fig.S5.Pseudo-second-sorption kinetics of BR46 on *P.Mutilus* at various solution temperatures

Fig. S 6. Plot of intra-particle diffusion modelling of CV onto *P. Mutilus* at different initial concentrations.

Fig. S7 Plot of intra-particle diffusion modelling of BR46 onto *P. Mutilus*

at different initial concentrations.

Fig. S8. Plot of intra-particle diffusion modelling of CV onto *P. Mutilus*

at different Temperatures.

Fig. S9. Plot of intra-particle diffusion modelling of BR46 onto *P. Mutilus*

at different temperatures.

Fig.S10.Pseudo-second-sorption kinetics of CV and BR46 onto *P.Mutilus* in binary system

Fig. S11. Plot of intra-particle diffusion modelling of CV and BR46 onto *P. Mutilus*

in binary system
